# Supplementary material for: Spontaneous buckling of contractile poroelastic actomyosin sheets
Source: PubMed Central journal article supplement (PMC6018151; doi:10.1038/s41467-018-04829-x), 2018-06-25
Supplement: 41467_2018_4829_MOESM2_ESM.pdf [file 41467_2018_4829_MOESM2_ESM.pdf]

## Description of Additional Supplementary Files

File Name: Supplementary Movie 1

Description: Fluorescence imaging of an actomyosin network at phases one and two of polymerization and reorganization, respectively, at high magnification (top view). Actin is labeled with Alexa-Fluor 488. This is the same gel as in Figure 1b-d.

File Name: Supplementary Movie 2

Description: Simultaneous fluorescence imaging of the formation and contraction of an actomyosin sheet (top view). Myosin motor clusters labeled with AlexaFluor 568 appear on the left and actin labeled with Alexa-Fluor 488 on the right. This is the same gel as shown in Figure 1a, i and in Supplementary Figures 1-4.

File Name: Supplementary Movie 3

Description: Contraction initiates at the gel boundaries. Particle Image Velocimetry analysis of a contracting circular network at low magnification (top view). Actin is labeled with Alexa-Fluor 488. This is the same gel as in Figure 1e-h.

File Name: Supplementary Movie 4

Description: Spinning disc confocal imaging of an actin sheet that spontaneously buckles. Maximal projection is shown in the xz-plane. Actin is labeled with Alexa-Fluor 488. This is the same gel as in Figure 2a-c.

File Name: Supplementary Movie 5

Description: Three views of the same gel shown in Supplementary Movie 4. Top view is the xy-plane for a specific height, left side view is the yz-plane, and top side view is the xz-plane. The xz- and yz-planes are taken along the lines shown in Figure 2c.

File Name: Supplementary Movie 6

Description: Laser scanning confocal imaging of the 3D gel structure shown in Fig. 2d, e at steady state. Actin is labeled with Alexa-Fluor 488.

File Name: Supplementary Movie 7

Description: The contracting actomyosin gel behaves as a poroelastic material I (low magnification). Beads of diameter 2.3  $\mu\text{m}$  (right) are moving on average in the outward radial direction as the gel (left) contracts towards its center. Actin is labeled with Alexa-Fluor 488. Beads are Nile-red. This is the same gel as in Figure 3 and in Supplementary Figure 10.

File Name: Supplementary Movie 8

Description: The contracting actomyosin gel behaves as a poroelastic material II (high magnification). Beads of diameter 0.2  $\mu\text{m}$  (the circle shows one such bead) move on average into the outward radial direction as the gel contracts towards its center. Actin is labeled with Alexa-Fluor 488. Beads are Fluoresbrite Yellow-Green. Scale bar is 100  $\mu\text{m}$ . This is the same gel as in Figure 4a-c and in Supplementary Figures 11-13.

File Name: Supplementary Movie 9

Description: Fluorescence imaging of a buckling contracting acto-myosin sheet at low magnification (top view). Actin is labeled with Alexa-Fluor 488. This is the same gel as in Figure 5.

File Name: Supplementary Movie 10

Description: Fluorescence imaging of a contracting acto-myosin sheet that undergoes rupture at low magnification (top view). Actin is labeled with Alexa-Fluor 488. This is the same gel as in Supplementary Figure 19.

File Name: Supplementary Movie 11

Description: Laser scanning confocal image of the 3D gel structure shown in Figure 6a, b at steady state. Actin is labeled with Alexa-Fluor 488. Grid mesh size is 100  $\mu\text{m}$ .

File Name: Supplementary Movie 12

Description: Laser scanning confocal image of the 3D gel structure shown in Figure 6c, d at steady state. Actin is labeled with Alexa-Fluor 488. Grid mesh size is 100  $\mu\text{m}$ .

File Name: Supplementary Movie 13

Description: Laser scanning confocal image of the 3D gel structure shown in Fig. 6e, f at steady state. Actin is labeled with Alexa-Fluor 488. Grid mesh size is 100  $\mu\text{m}$ .
